# Supplementary material for: Intrinsic ultralow lattice thermal conductivity in lead-free halide perovskites Cs3Bi2X9 (X = Br, I)
Source: Royal Society of Chemistry journal article supplement (doi:10.1039/d4cp02005g), 2024-01-01
Supplement: d4cp02005g1.pdf [file d4cp02005g1.pdf]

## Supplementary Information

### Intrinsic ultralow lattice thermal conductivity in lead-free halide perovskites $\text{Cs}_3\text{Bi}_2\text{X}_9$ ( $\text{X} = \text{Br}, \text{I}$ )

Jiang-Jiang Ma,<sup>‡a</sup> Jing-Jing Zheng,<sup>‡b</sup> Yuxi Chen,<sup>a</sup> Qingyong Ren,<sup>cde</sup> Junfeng Zhang<sup>af\*</sup> and Bao-Tian Wang<sup>cdg\*</sup>

<sup>a</sup> School of Physics and Information Engineering, Shanxi Normal University, Taiyuan 030031, China;

<sup>b</sup> Department of Physics, Taiyuan Normal University, Jinzhong, 030619, China;

<sup>c</sup> Institute of High Energy Physics, Chinese Academy of Sciences (CAS), Beijing 100049, China;

<sup>d</sup> Spallation Neutron Source Science Center, Dongguan 523803, China;

<sup>e</sup> Guangdong Provincial Key Laboratory of Extreme Conditions, Dongguan, 523803, China;

<sup>f</sup> College of Physics and Electronic Engineering, Hainan Normal University, Haikou 571158, China;

<sup>g</sup> Collaborative Innovation Center of Extreme Optics, Shanxi University, Taiyuan, Shanxi 030006, China

#### 1. The formulas for mechanical properties

(i) The mechanical stability criteria for the Rhombohedral (I) systems of  $\text{Cs}_3\text{Bi}_2\text{Br}_9$  written as:

$$\begin{aligned} C_{11} &> |C_{12}|, \quad C_{44} > 0, \\ C_{13}^2 &< \frac{1}{2} C_{33} (C_{11} + C_{12}), \\ C_{14}^2 &< \frac{1}{2} C_{44} (C_{11} - C_{12}) \equiv C_{44} C_{66} \end{aligned} \quad (\text{S1})$$

(ii) The mechanical stability criteria for the hexagonal systems of  $\text{Cs}_3\text{Bi}_2\text{I}_9$  written as:

$$\begin{aligned} C_{11} &> |C_{12}|, \\ 2C_{13}^2 &< C_{33} (C_{11} + C_{12}), \\ C_{44} &> 0, \quad C_{66} > 0, \end{aligned} \quad (\text{S2})$$

(iii) For rhombohedral crystal, the upper and lower bounds of bulk modulus are defined as:

$$\begin{aligned} B_v &= \frac{1}{9} (2C_{11} + C_{33} + 2C_{12} + 4C_{13}), \\ B_R &= (2C_{11} + C_{33} + 2C_{12} + 4C_{13})^{-1}. \end{aligned} \quad (\text{S3})$$

The upper and lower shear modulus are defined as:

$$\begin{aligned} G_v &= \frac{1}{15} (2C_{11} + C_{33} - C_{12} - 2C_{13} + 6C_{44} + 3C_{66}), \\ G_R &= 15(8C_{11} + 4C_{33} - 4C_{12} - 8C_{13} + 6C_{44} + 3C_{66}). \end{aligned} \quad (\text{S4})$$

(iv) For hexagonal crystal, the upper and lower bounds of bulk modulus and shear modulus are defined as:

$$\begin{aligned}
B_v &= \frac{1}{9}(2(C_{11} + C_{12}) + 4C_{13} + C_{33}), \\
B_R &= C^2 / M, \\
G_V &= \frac{1}{30}(M + 12C_{44} + 12C_{66}), \\
G_R &= \frac{5}{2}[C^2 C_{44} C_{66}] / [3B_V C_{44} C_{66} + C^2(C_{44} + C_{66})], \\
M &= C_{11} + C_{12} + 2C_{33} - 4C_{13}, \\
C^2 &= (C_{11} + C_{12})C_{33} - 2C_{13}^2.
\end{aligned} \tag{S5}$$

(v) The bulk modulus (B) and shear modulus (G) for are calculated from the Voigt-Reuss-Hill (VRH) approximations as follows:

$$B = \frac{1}{2}(B_v + B_R), \quad G = \frac{1}{2}(G_v + G_R) \tag{S6}$$

The Young's modulus (E) are calculated through:

$$E = \frac{9BG}{3B + G} \tag{S7}$$

(vi) The Poisson ratio ( $\nu$ ), Debye temperature  $\theta_D$  (K) and Grüneisen parameter ( $\gamma$ ) are calculated following relationships:

$$\nu = \frac{1 - 2(\nu_t / \nu_l)^2}{2 - 2(\nu_t / \nu_l)^2} \tag{S8}$$

where  $\nu_t$  is the transverse wave velocity,  $\nu_l$  is the longitudinal wave velocity.

$$\theta_D = \frac{h}{k_B} \left[ \frac{3N}{4\pi V} \right]^{1/3} v_m \tag{S9}$$

where  $h$  is Planck's constant,  $k_B$  is the Boltzmann constant,  $N$  is the number of atoms in a unit cell,  $V$  is the unit-cell volume, and  $v_m$  is the average phonon velocity, respectively.

$$\gamma = \frac{3}{2} \left( \frac{1 + \nu}{2 - 3\nu} \right) \tag{S10}$$

where  $\nu$  is Poisson's ratio.

## 2. The formula for participation ratio

The participation ratio (PR) is used to analyze the localized nature of the phonon mode. The PR value is defined as follow [1, 2]:

$$PR(\omega_q) = \frac{\left( \sum_{i=1}^N \frac{|e(i, \omega_q)|^2}{M_i} \right)^2}{N \sum_{i=1}^N \frac{|e(i, \omega_q)|^4}{M_i^2}} \tag{S11}$$

where  $e(i, \omega_q)$  are the phonon polarization vectors and  $M_i$  are the masses of the atoms.

**Table S1.** The Wyckoff positions fractional, partial charges and volume for atoms in Cs<sub>3</sub>Bi<sub>2</sub>Br<sub>9</sub> and Cs<sub>3</sub>Bi<sub>2</sub>I<sub>9</sub>.

| Materials                                       | Atoms  | Wyckoff Positions fractional |      |      | Partial charge | Bader volume |
|-------------------------------------------------|--------|------------------------------|------|------|----------------|--------------|
|                                                 |        | x                            | y    | z    |                |              |
| Cs <sub>3</sub> Bi <sub>2</sub> Br <sub>9</sub> | Br(6i) | 0.84                         | 0.16 | 0.34 | -3.30          | 41.0         |
|                                                 | Br(3e) | 0.50                         | 0.00 | 0.00 | -1.86          | 39.5         |
|                                                 | Bi(2d) | 0.33                         | 0.67 | 0.81 | +2.60          | 22.5         |
|                                                 | Cs(2d) | 0.33                         | 0.67 | 0.34 | +1.70          | 41.2         |
|                                                 | Cs(1a) | 0.00                         | 1.00 | 0.00 | +0.86          | 41.9         |
| Cs <sub>3</sub> Bi <sub>2</sub> I <sub>9</sub>  | I(12k) | 0.16                         | 0.32 | 0.92 | -5.93          | 51.4         |
|                                                 | I(6h)  | 0.49                         | 0.99 | 0.25 | -3.07          | 51.1         |
|                                                 | Bi(4f) | 0.33                         | 0.67 | 0.66 | +3.99          | 24.9         |
|                                                 | Cs(4f) | 0.33                         | 0.67 | 0.07 | +3.33          | 43.3         |
|                                                 | Cs(2b) | 0.00                         | 0.00 | 0.25 | +1.68          | 43.4         |

**Table S2.** Calculated lattice constants a (Å) and c (Å) for Cs<sub>3</sub>Bi<sub>2</sub>Br<sub>9</sub> and Cs<sub>3</sub>Bi<sub>2</sub>I<sub>9</sub>. The other experimental values are also listed for comparison.

| Materials                                       | Space group                   | Method  | a&b (Å) | c (Å)  |
|-------------------------------------------------|-------------------------------|---------|---------|--------|
| Cs <sub>3</sub> Bi <sub>2</sub> Br <sub>9</sub> | P-3m1<br>(164)                | EXP [3] | 7.972   | 9.867  |
|                                                 |                               | EXP [4] | 7.969   | 9.858  |
|                                                 |                               | PBE     | 8.194   | 10.110 |
|                                                 |                               | PBEsol  | 7.925   | 9.816  |
|                                                 |                               | DS-PAW  | 7.925   | 9.816  |
| Cs <sub>3</sub> Bi <sub>2</sub> I <sub>9</sub>  | P6 <sub>3</sub> /mmc<br>(194) | EXP [5] | 8.404   | 21.183 |
|                                                 |                               | EXP [6] | 8.416   | 21.200 |
|                                                 |                               | PBE     | 8.637   | 22.213 |
|                                                 |                               | PBEsol  | 8.342   | 21.315 |
|                                                 |                               | DS-PAW  | 8.342   | 21.311 |

To balance the adequate calculation accuracy against the finite computational resources, we employed the PBE and PBEsol functional for structure optimization in VAPS code. Using PBE overestimates the lattice constants, while PBEsol underestimates them. In comparison, the calculations with PBEsol yield results that are closer to the experimental values of lattice constants. The crystal structure optimization is also verified using DS-PAW software [7], as shown in Table S1. The optimized lattice constants are in the best agreement with the experimental and theoretical values.

**Table S3.** Calculated bond length and the values of -ICOHP for Cs<sub>3</sub>Bi<sub>2</sub>Br<sub>9</sub> and Cs<sub>3</sub>Bi<sub>2</sub>I<sub>9</sub>.

| Materials                                       | Bond    | Bond length (Å) | -ICOHP (eV) |
|-------------------------------------------------|---------|-----------------|-------------|
| Cs <sub>3</sub> Bi <sub>2</sub> Br <sub>9</sub> | Bi-Br1  | 2.741           | -2.864      |
|                                                 | Bi-Br2  | 2.953           | -1.547      |
|                                                 | Cs1-Br1 | 3.909           | -0.257      |
|                                                 | Cs2-Br1 | 4.026           | -0.236      |
|                                                 | Cs2-Br2 | 3.962           | -0.249      |
| Cs <sub>3</sub> Bi <sub>2</sub> I <sub>9</sub>  | Bi-I1   | 2.963           | -2.196      |
|                                                 | Bi-I2   | 3.199           | -1.162      |
|                                                 | Cs1-I1  | 4.060           | -0.265      |
|                                                 | Cs2-I1  | 4.286           | -0.209      |
|                                                 | Cs2-I2  | 4.172           | -0.250      |

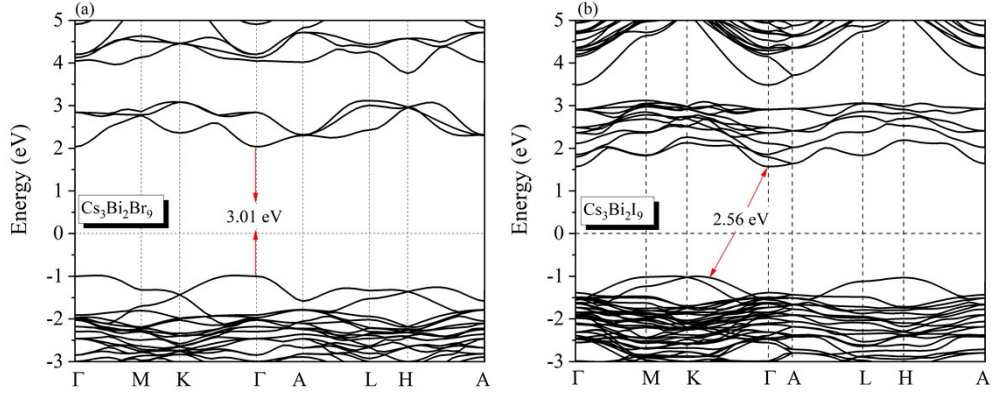

**Fig. S1** Electronic band structures of (c)  $\text{Cs}_3\text{Bi}_2\text{Br}_9$  and (d)  $\text{Cs}_3\text{Bi}_2\text{I}_9$ .

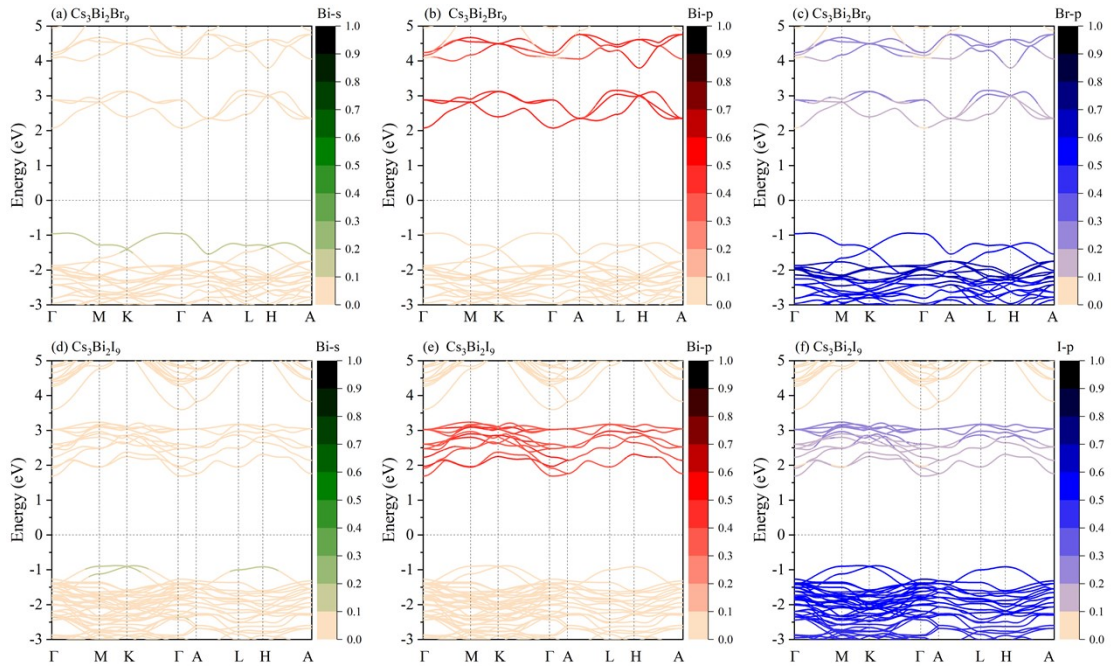

**Fig. S2** The orbital-projected band of (a) Bi-s, (b) Bi-p, (c) Br-p and (d) Bi-s, (e) Bi-p, (f) I-p for  $\text{Cs}_3\text{Bi}_2\text{Br}_9$  and  $\text{Cs}_3\text{Bi}_2\text{I}_9$ , respectively.

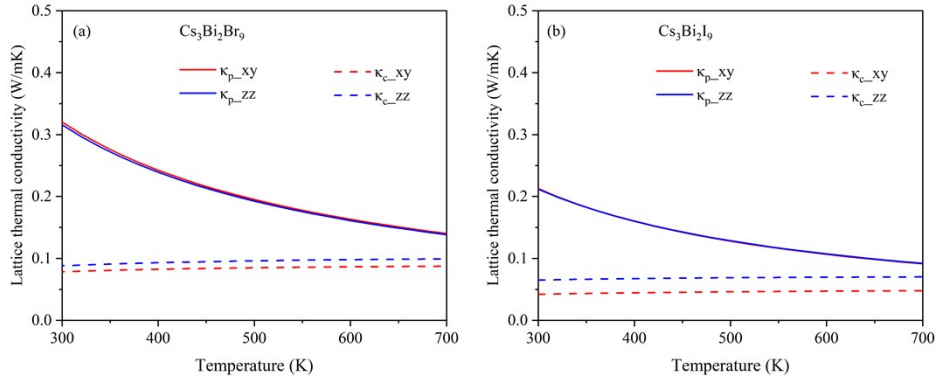

**Fig. S3** Calculated lattice thermal conductivity for (a)  $\text{Cs}_3\text{Bi}_2\text{Br}_9$  and (b)  $\text{Cs}_3\text{Bi}_2\text{I}_9$  as a function of temperature along xy and z directions. The  $\kappa_p$  and  $\kappa_c$  are the particle-like and glass-like contribution for lattice thermal conductivity, respectively.

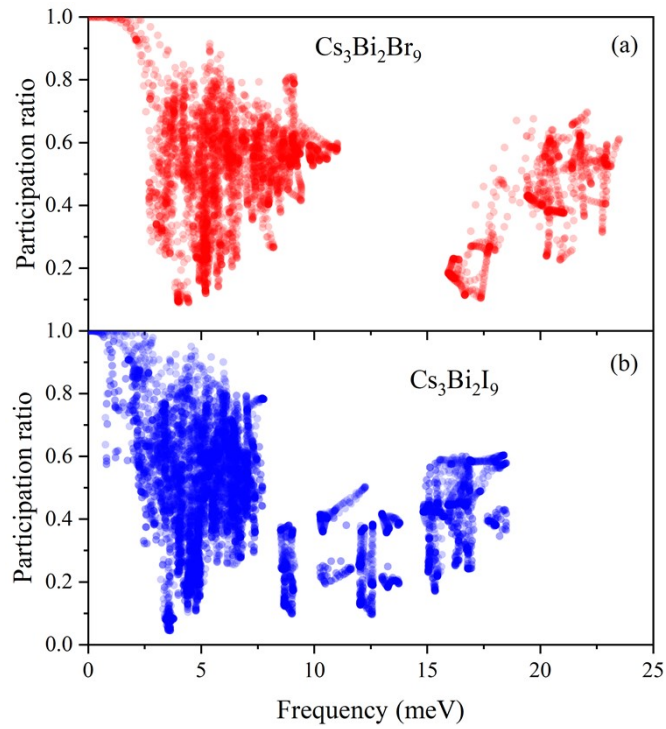

**Fig. S4** The calculated participation ratios for the  $\text{Cs}_3\text{Bi}_2\text{Br}_9$  and  $\text{Cs}_3\text{Bi}_2\text{I}_9$

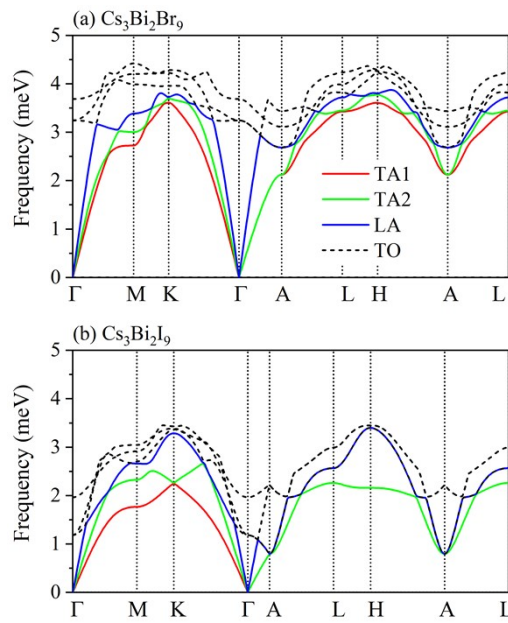

**Fig. S5** The dispersion curves of acoustic modes and three low-lying optical modes for (a)  $\text{Cs}_3\text{Bi}_2\text{Br}_9$  and (b)  $\text{Cs}_3\text{Bi}_2\text{I}_9$ , respectively.

## References

- [1] J. Hafner, M. Krajci. *J Phys-condens Mat.*, 1993, **5**, 2489.
- [2] P. Norouzzadeh, C. W. Myles, D. Vashaee. *Phys Rev B*, 2017, **95**, 195206.
- [3] F. Lazarini. *Acta Crystallogr B Struc. Sci. Cryst. Eng. Mater.*, 1977, **33**, 2961.
- [4] D. Samanta, P. Saha, B. Ghosh, S.P. Chaudhary, S. Bhattacharyya, S. Chatterjee, G.D. Mukherjee. *J Phys. Chem. C*, 2021, **125**, 3432.
- [5] A. Jorio, R. Currat, D. Myles, G. McIntyre, I. Aleksandrova, J. Kiat, P. Saint-Grégoire. *Phys. Rev. B* 2000, **61**, 3857.
- [6] A.J. Lehner, D.H. Fabini, H.A. Evans, C.-A. Hébert, S.R. Smock, J. Hu, H. Wang, J.W. Zwanziger, M.L. Chabinyo, R. Seshadri. *Chem. Mater.* 2015, **27**, 7137.
- [7] P.E. Blöchl. *Phys. Rev. B*, 1994, 50, 17953.
